# Supplementary material for: Temperature induces changes in Drosophila energy stores
Source: PubMed Central journal article supplement (PMC6437209; doi:10.1038/s41598-019-41754-5), 2019-03-27
Supplement: 41598_2019_41754_MOESM1_ESM.pdf [file 41598_2019_41754_MOESM1_ESM.pdf]

## *Supplementary Information*

# **Temperature induces changes in *Drosophila* energy stores**

Peter Klepsatel, David Wildridge and Martina Gálíková

### **Supplementary Figures and Tables**

**Supplementary Figure S1. Body weight.** Comparison of individual body weights of the flies used for the metabolic rate measurements. Data are presented as a mean body weight per individual  $\pm$  s.e.m. Sample size is reported in parenthesis. Data analyses by one-way ANOVA (with Tukey's HSD (honestly significant difference) post-hoc tests with  $\alpha = 0.05$ ) did not reveal any significant differences among samples (Oregon:  $F_{10,107} = 0.98$ ,  $P$ -value = 0.46; Canton:  $F_{10,103} = 1.26$ ,  $P$ -value = 0.27).

Supplementary Figure S1.

Oregon R

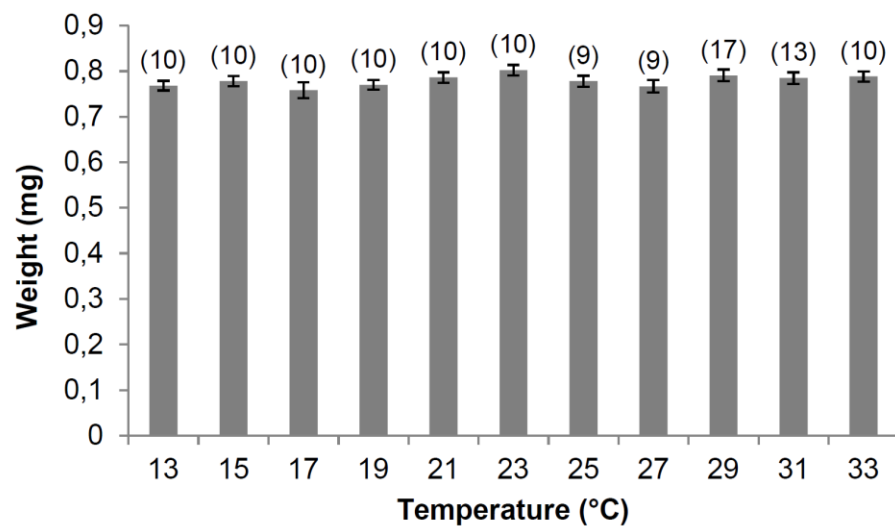

Canton S

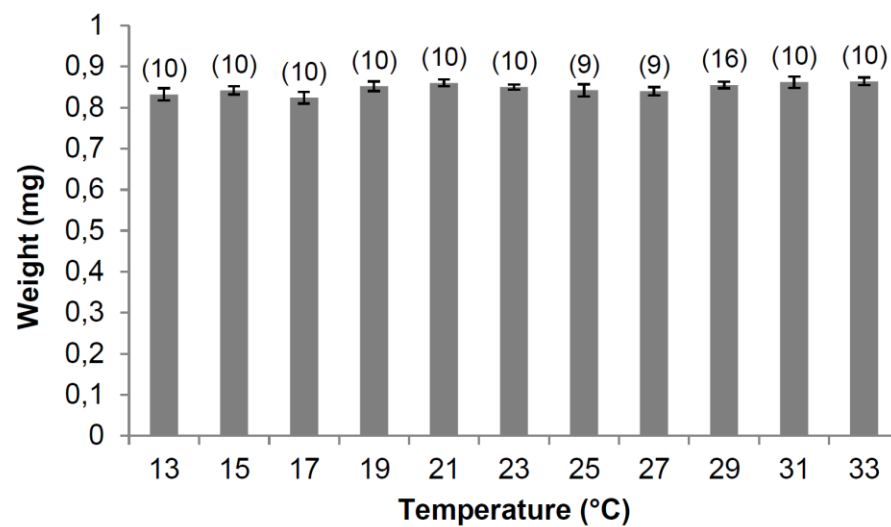

**Supplementary Table S1.** The Akaike Information Criterion (AICc) and coefficient of determination ( $R^2$ ) for different functions fitted to data on the temperature dependence of different traits. See Materials and methods for further details.

| Trait                                             | Genotype | Linear        |             | Quadratic     |             | Cubic  |       | Exponential   |             |
|---------------------------------------------------|----------|---------------|-------------|---------------|-------------|--------|-------|---------------|-------------|
|                                                   |          | AICc          | $R^2$       | AICc          | $R^2$       | AICc   | $R^2$ | AICc          | $R^2$       |
| Fat content                                       | Oregon R | 92.64         | 0.21        | <b>70.37</b>  | <b>0.94</b> | 77.08  | 0.94  | -             | -           |
|                                                   | Canton S | 84.90         | 0.02        | <b>64.74</b>  | <b>0.93</b> | 72.19  | 0.94  | -             | -           |
|                                                   | combined | 172.12        | 0.14        | <b>127.15</b> | <b>0.93</b> | 136.85 | 0.94  | -             | -           |
| Relative changes in the fat content               | Oregon R | 17.82         | 0.38        | <b>3.49</b>   | <b>0.90</b> | 10.21  | 0.90  | -             | -           |
|                                                   | Canton S | 26.17         | 0.08        | <b>12.88</b>  | <b>0.87</b> | 17.86  | 0.91  | -             | -           |
|                                                   | combined | 40.44         | 0.25        | <b>9.61</b>   | <b>0.88</b> | 15.77  | 0.91  | -             | -           |
| Glycogen content                                  | Oregon R | 78.52         | 0.40        | <b>76.38</b>  | <b>0.69</b> | 81.84  | 0.74  | -             | -           |
|                                                   | Canton S | 81.95         | 0.04        | <b>78.00</b>  | <b>0.65</b> | 86.89  | 0.65  | -             | -           |
|                                                   | combined | 157.18        | 0.20        | <b>147.23</b> | <b>0.67</b> | 157.55 | 0.69  | -             | -           |
| Metabolic rate                                    | Oregon R | <b>-5.90</b>  | <b>0.99</b> | -1.77         | 0.99        | -      | -     | 11.77         | 0.94        |
|                                                   | Canton S | -8.86         | 0.99        | <b>-11.51</b> | <b>0.99</b> | -      | -     | 10.19         | 0.94        |
|                                                   | combined | <b>-19.67</b> | <b>0.99</b> | -18.53        | 0.99        | -      | -     | 16.90         | 0.94        |
| Food intake                                       | Oregon R | <b>-40.98</b> | <b>0.99</b> | -37.36        | 0.99        | -      | -     | -22.69        | 0.96        |
|                                                   | Canton S | <b>-37.94</b> | <b>0.99</b> | -33.46        | 0.99        | -      | -     | -24.37        | 0.96        |
|                                                   | combined | <b>-83.82</b> | <b>0.99</b> | -77.81        | 0.99        | -      | -     | -52.10        | 0.96        |
| Starvation survival time                          | Oregon R | 89.78         | 0.92        | -             | -           | -      | -     | <b>63.68</b>  | <b>0.99</b> |
|                                                   | Canton S | 83.87         | 0.94        | -             | -           | -      | -     | <b>55.84</b>  | <b>0.99</b> |
|                                                   | combined | 169.33        | 0.93        | -             | -           | -      | -     | <b>115.79</b> | <b>0.99</b> |
| Starvation survival time (vs inverse temperature) | Oregon R | <b>60.33</b>  | <b>0.99</b> | 64.74         | 0.99        | -      | -     | -             | -           |
|                                                   | Canton S | <b>43.53</b>  | <b>0.99</b> | 48.55         | 0.99        | -      | -     | -             | -           |
|                                                   | combined | <b>104.62</b> | <b>0.99</b> | 111.44        | 0.99        | -      | -     | -             | -           |

**Supplementary Table S2.** Multiple nonlinear (quadratic) regression analyses for the changes in the fat content ( $\mu\text{g}$  glycerides per fly) and the glycogen content ( $\mu\text{g}$  glycogen per fly). See Materials and methods for further details. *df* - degrees of freedom; SSQ - the sum of squares for each source of variation.

| <b>Trait</b>     | <b>Source of variation</b>                   | <b><i>df</i></b> | <b>SSQ</b> | <b><i>F</i>-ratio</b> | <b><i>P</i>-value</b> |
|------------------|----------------------------------------------|------------------|------------|-----------------------|-----------------------|
| Fat content      | Genotype                                     | 1                | 1.79       | 0.15                  | 0.70                  |
|                  | Initial fat content                          | 1                | 79.03      | 6.63                  | 0.013                 |
|                  | Temperature                                  | 1                | 5503.73    | 461.84                | <0.0001               |
|                  | (Temperature) <sup>2</sup>                   | 1                | 6158.22    | 516.76                | <0.0001               |
|                  | Genotype $\times$ Temperature                | 1                | 90.08      | 7.56                  | 0.008                 |
|                  | Genotype $\times$ (Temperature) <sup>2</sup> | 1                | 93.04      | 7.81                  | 0.007                 |
|                  | Error                                        | 56               | 667.36     | -                     | -                     |
| Glycogen content | Genotype                                     | 1                | 1.67       | 0.05                  | 0.83                  |
|                  | Temperature                                  | 1                | 1810.38    | 50.30                 | <0.0001               |
|                  | (Temperature) <sup>2</sup>                   | 1                | 1942.77    | 53.98                 | <0.0001               |
|                  | Genotype $\times$ Temperature                | 1                | 333.10     | 9.26                  | 0.004                 |
|                  | Genotype $\times$ (Temperature) <sup>2</sup> | 1                | 267.44     | 7.43                  | 0.009                 |
|                  | Error                                        | 57               | 2051.44    | -                     | -                     |

**Supplementary Table S3.** Linear regression analyses for metabolic and consumption rate. *df* - degrees of freedom; SSQ - the sum of squares for each source of variation.

| <b>Trait</b>     | <b>Source of variation</b> | <b><i>df</i></b> | <b>SSQ</b> | <b><i>F</i>-ratio</b> | <b><i>P</i>-value</b> |
|------------------|----------------------------|------------------|------------|-----------------------|-----------------------|
| Metabolic rate   | Genotype                   | 1                | 0.006      | 0.03                  | 0.87                  |
|                  | Temperature                | 1                | 271.09     | 1152.19               | < 0.0001              |
|                  | Genotype × Temperature     | 1                | 0.54       | 2.27                  | 0.13                  |
|                  | Error                      | 248              | 58.35      | -                     | -                     |
| Consumption rate | Genotype                   | 1                | 1.76       | 105.65                | < 0.0001              |
|                  | Temperature                | 1                | 37.21      | 2238.56               | < 0.0001              |
|                  | Genotype × Temperature     | 1                | 0.0004     | 0.02                  | 0.88                  |
|                  | Error                      | 503              | 8.36       | -                     | -                     |

**Supplementary Table S4.** Comparison of temperature dependence of metabolic and consumption rates (based on the mean values) by linear regression analyses for individual genotypes. *df* - degrees of freedom; SSQ - the sum of squares for each source of variation.

| <b>Genotype</b> | <b>Source of variation</b> | <b><i>df</i></b> | <b>SSQ</b> | <b><i>F</i>-ratio</b> | <b><i>P</i>-value</b> |
|-----------------|----------------------------|------------------|------------|-----------------------|-----------------------|
| Oregon R        | Trait                      | 1                | 0.007      | 4.28                  | 0.053                 |
|                 | Temperature                | 1                | 2.98       | 1803.41               | < 0.0001              |
|                 | Trait × Temperature        | 1                | 0.005      | 2.75                  | 0.12                  |
|                 | Error                      | 18               | 0.03       | -                     | -                     |
| Canton S        | Trait                      | 1                | 0.02       | 14.57                 | 0.0013                |
|                 | Temperature                | 1                | 2.35       | 1685.11               | < 0.0001              |
|                 | Trait × Temperature        | 1                | 0.005      | 3.71                  | 0.07                  |
|                 | Error                      | 18               | 0.03       | -                     | -                     |
